# Supplementary material for: R-Ketorolac Targets Cdc42 and Rac1 and Alters Ovarian Cancer Cell Behaviors Critical for Invasion and Metastasis
Source: Oxford University Press journal article supplement (doi:10.1158/1535-7163.mct-15-0419), 2015-07-23
Supplement: 15357163mct150419-sup-150079_1_supp_3036959_nqkjdz.docx [file 15357163mct150419-sup-150079_1_supp_3036959_nqkjdz.docx]

**Supplementary Table 2**

**Biochemical properties of Cdc42 and Rac1 nucleotide binding (BODIPY-GTP) with R- or S-ketorolac treatment**

|  |  | Cdc42 | | Rac1 | |
| --- | --- | --- | --- | --- | --- |
| R-ketorolac | S-ketorolac | R-ketorolac | S-ketorolac |
| ***Bmax*** | 0.1% DMSO | 1303 ± 38.45 | 1429 ± 49.49 | 1594 ± 28.08 | 1595 ± 23.75 |
| 1 µM | 1243 ± 22.98 | 1436 ± 48.54 | 1428 ± 21.17 | 1509 ± 19.02 |
| 10µM | 1134 ± 29.46 | 1426 ± 52.29 | 1355 ± 26.64 | 1471 ± 25.36 |
| 100µM | 1009 ± 13.20 | 1388 ± 38.97 | 1249 ± 23.76 | 1444 ± 27.02 |
|  |  |  |  |  |  |
| ***Kd*** | 0.1% DMSO | 303.6 ± 26.56 | 219.6 ± 24.47 | 206.2 ± 13.66 | 230.7 ± 10.93 |
| 1 µM | 288.7 ± 16.03 | 195.8 ± 21.98 | 185.9 ± 10.59 | 204.4 ± 8.433 |
| 10µM | 226.6 ± 12.42 | 197.5 ± 23.90 | 176.1 ± 13.43 | 193.4 ± 11.06 |
| 100µM | 195.6 ± 8.465 | 186.7 ± 17.54 | 169.8 ± 11.94 | 180.6 ± 11.39 |

The Bmax and Kd for the nucleotide binding (BODIPY-GTP) values were derived from data shown in Fig. 1B-1E using Prism 5 software (GraphPad).
